# Supplementary material for: Rates, causes, place and predictors of mortality in adults with intellectual disabilities with and without Down syndrome: cohort study with record linkage
Source: PubMed Central journal article supplement (PMC7239521; doi:10.1136/bmjopen-2019-036465), 2020-05-17
Supplement: bmjopen-2019-036465supp001.pdf [file bmjopen-2019-036465supp001.pdf]

Rates, causes, place, and predictors of mortality in adults with intellectual disabilities with and without Down syndrome: cohort study with record linkage

**Supplementary table 1. Previously reported standardised mortality ratios, causes, and risks for death**

| Author                                 | Country   | SMR (95% confidence interval)                                                                                                                                                                                                                                                                                                                                                                                                                                                                                                                                                         | Number of deaths                 | Causes of death and risk factors for death                                                                                                                                                                                                                                                                 |
|----------------------------------------|-----------|---------------------------------------------------------------------------------------------------------------------------------------------------------------------------------------------------------------------------------------------------------------------------------------------------------------------------------------------------------------------------------------------------------------------------------------------------------------------------------------------------------------------------------------------------------------------------------------|----------------------------------|------------------------------------------------------------------------------------------------------------------------------------------------------------------------------------------------------------------------------------------------------------------------------------------------------------|
| Forsgren et al (1996) <sup>7</sup>     | Sweden    | 4.2 (3.3, 5.3) at 20-59y; 1.1 (0.9, 1.5) at 60+y<br><i>Without epilepsy:</i><br>3.8 (2.8, 5.0) at 20-59y; 1.1 (0.8, 1.5) at 60+y<br><i>With epilepsy:</i><br>5.0 (2.9, 8.7) at 20-59y; 2.4 (0.9, 6.1) at 60+y<br><i>With epilepsy and cerebral palsy:</i><br>8.0 (4.1, 15.7) at 20-59y; 0.9 (0.1, 6.6) at 60+y<br><i>M:</i> 1.6 (1.2, 2.0) at 0-60+y<br><i>F:</i> 2.6 (2.0, 3.3) at 0-60+y<br><i>Mild ID:</i> 1.8 (1.1, 2.7) at 0-60+y<br><i>Moderate ID:</i> 1.5 (1.1, 2.0) at 0-60+y<br><i>Severe ID:</i> 2.0 (1.5, 2.6) at 0-60+y<br><i>Profound ID:</i> 8.1 (5.6, 11.7) at 0-60+y | 124 at 0-60+y;<br>112 at 20-60+y | <i>Underlying cause at 0-60+y:</i><br>Congenital anomalies: SMR=46.3 (32.9, 65.0)<br>Nervous system: SMR=9.7 (5.5, 17.0)<br>Mental disorder: SMR=4.0 (1.9, 8.4)<br>Respiratory: SMR=3.3 (2.0, 5.5)<br>Circulatory: SMR=2.1 (1.6, 2.7)<br>Violent death: SMR=1.4 (0.6, 2.8)<br>Neoplasm: SMR=0.9 (0.6, 1.6) |
| Durvasula & Beange (2002) <sup>8</sup> | Australia | 4.9 (3.4, 6.4) at 10-59y<br><i>M:</i> 4.1 (2.4, 5.9) at 10-59y<br><i>F:</i> 6.2 (3.3, 9.1) at 10-59y                                                                                                                                                                                                                                                                                                                                                                                                                                                                                  | 40 at 10-59y;<br>31 at 20-59y    | <i>Underlying cause at 10-59y:</i><br>Respiratory: 35% (pneumonia, aspiration)<br>External causes: 20%<br>Neoplasm: 17.5%<br>Heart disease: 15% (congenital heart disease 50%)<br>Gastrointestinal: 7.5% (ischaemic bowel, perforated peptic ulcer, post-operative peritonitis)<br>Seizure: 5%             |
| Tyrer et al (2007) <sup>9</sup>        | England   | 3.24 (2.93, 3.56) at 20-70+y<br><i>M:</i> 2.86 (2.50, 3.26) at 20-70+y<br><i>F:</i> 3.63 (3.12, 4.20) at 20-70+y<br>1.51 (1.23, 1.83) to 11.50 (8.14, 15.78) at 20-70+y<br><i>M:</i> 1.39 (1.03, 1.82) to 8.83 (5.60, 13.25) at 20-70+y<br><i>F:</i> 1.60 (1.18, 2.12) to 17.22 (9.64, 28.4) at 20-70+y<br><i>With Down syndrome:</i> 7.60 at 20-70+y<br><i>Without Down syndrome:</i> 2.70 at 20-70+y                                                                                                                                                                                | 409 at 20-70+y                   | Not reported                                                                                                                                                                                                                                                                                               |
| Patja et al (2008) <sup>10</sup>       | Finland   | <i>M:</i> 2.2 at 20-39y, 1.0 at 40-59y, 1.0 at 60+y<br><i>F:</i> 1.4 at 20-39y, 1.1 at 40-49y, 1.0 at 60+y<br><i>Mild ID:</i><br><i>M:</i> 1.6 at 20-39y, 1.0 at 40-59y, 1.0 at 60+y<br><i>F:</i> 1.2 at 20-39y, 1.1 at 40-49y, 1.0 at 60+y                                                                                                                                                                                                                                                                                                                                           | 1,046 at 20-97y                  | <i>Underlying cause at 2-97y:</i><br>Vascular: 36% (cardiac infarct 33%, cerebral infarct 33%, congenital heart disease 18%, pulmonary infarct 6%)<br>Respiratory: 22% (pneumonia 83%, COPD 11%)                                                                                                           |

## Rates, causes, place, and predictors of mortality in adults with intellectual disabilities with and without Down syndrome: cohort study with record linkage

|                                           |                     |                                                                                                                                                                                                                                                                                                                                                                                      |                                      |                                                                                                                                                                                                                                                                                                                                                                                                                                                                                                                                                            |
|-------------------------------------------|---------------------|--------------------------------------------------------------------------------------------------------------------------------------------------------------------------------------------------------------------------------------------------------------------------------------------------------------------------------------------------------------------------------------|--------------------------------------|------------------------------------------------------------------------------------------------------------------------------------------------------------------------------------------------------------------------------------------------------------------------------------------------------------------------------------------------------------------------------------------------------------------------------------------------------------------------------------------------------------------------------------------------------------|
|                                           |                     | <p><i>Moderate ID:</i><br/>M: 2.3 at 20-39y, 1.1 at 40-59y, 1.0 at 60+y<br/>F: 1.5 at 20-39y, 1.1 at 40-49y, 1.0 at 60+y</p> <p><i>Severe ID:</i><br/>M: 2.6 at 20-39y, 1.2 at 40-59y, 1.0 at 60+y<br/>F: 1.6 at 20-39y, 1.0 at 40-49y, 1.0 at 60+y</p> <p><i>Profound ID:</i><br/>M: 2.1 at 20-39y, 1.1 at 40-59y, 1.0 at 60+y<br/>F: 1.3 at 20-39y, 1.2 at 40-49y, 1.0 at 60+y</p> |                                      | <p>Neoplasm: 11% (digestive 44%, respiratory 15%, urogenital, 12%)<br/>Digestive: 7% (intestinal obstruction 25%, ulcer perforation 13%)<br/>Accidents and poisonings: 7% (commonest was fatal fracture, then drowning)<br/>Vascular, neoplasm, and accident causes were less common than sex-age-matched general population; Digestive were 2.5 times, Respiratory 2.6-5.8 times more common</p>                                                                                                                                                          |
| Tyrer & McGother (2009) <sup>11</sup>     | England             | <p>2.77 (2.53, 3.03) at 20+y<br/>M: 2.28 (2.02, 2.56) at 20+y<br/>F: 3.24 (2.83, 3.69) at 20+y</p>                                                                                                                                                                                                                                                                                   | 503 at 20+y                          | <p><i>Underlying cause at 20+y:</i><br/>Pneumonia: 13.1%, SMR=6.47 (5.00, 8.23)<br/>Nervous system: 13.1%, SMR=16.30 (12.61, 20.74)<br/>Other respiratory: 12.9%, SMR=4.64 (3.58, 5.91)<br/>Ischaemic heart disease: 11.5%, SMR=1.49 (1.13, 1.92)<br/>Neoplasm: 9.3%<br/>Congenital anomalies: 9.1%, SMR=85.60 (62.67, 114.18)<br/>Cerebrovascular disease: 7.8%, SMR=2.40 (1.71, 3.28)</p>                                                                                                                                                                |
| Oullette-Kuntz et al (2015) <sup>12</sup> | Canada              | <p>2.5 (2.1, 2.9) at 0-60+y<br/>M: 2.1 (1.7, 2.6) at 0-60+y<br/>F: 3.0 (2.4, 3.8) at 0-60+y<br/>M: 1.7 (1.3, 2.3) to 3.4 (2.3, 4.7) at 20-60+y<br/>F: 2.1 (1.4, 2.9) to 6.1 (4.1, 8.6) at 20-60+y</p>                                                                                                                                                                                | 172 at 0-60+y;<br>158 at 20-60+y     | <p><i>Risk factors for death:</i><br/>Age, Down syndrome (OR=1.76 at 20-39y; OR=1.69 at 40-59y; OR=22.34 at 60+y), cerebral palsy (OR=2.39 at 20-39y; OR=0.93 at 40-59y; OR=0.50 at 60+y), blindness/low vision (OR not given), technological dependence/medical fragility (OR=11.96 at 20-39y; OR=7.28 at 40-59y; OR=3.42 at 60+y), wheelchair dependence (OR=5.96 at 20-39y; OR=2.89 at 40-59y; OR=2.56 at 60+y), mobility impairment without wheelchair dependence (OR not given), epilepsy (OR=1.83 at 20-39y; OR=1.80 at 40-59y; OR=1.09 at 60+y)</p> |
| Florio & Troller (2015) <sup>13</sup>     | Australia           | <p>2.48 (2.32, 2.64) at 0-85+y<br/>3.15 (2.94, 3.38) at 5-69y<br/>M: 2.52 (2.29, 2.77) at 5-69y<br/>F: 4.26 (3.83, 4.74) at 5-69y</p>                                                                                                                                                                                                                                                | 953 at 0-85+y;<br>831 at 15+y        | Not reported                                                                                                                                                                                                                                                                                                                                                                                                                                                                                                                                               |
| McCarron et al (2015) <sup>14</sup>       | Republic of Ireland | <p>3.85 (3.70, 4.00) at 0-80+y<br/>M: 3.09 (2.93, 3.25) at 0-80+y<br/>F: 4.90 (4.63, 5.17) at 0-80+y<br/>2.71 (2.41, 3.04) to 6.09 (5.29, 6.96) at 20-80y<br/>M: 2.50 (2.18, 2.86) to 4.50 (3.69, 5.44) at 20-80y<br/>F: 2.71 (2.32, 3.14) to 10.07 (8.99, 13.10) at 20-80y</p>                                                                                                      | 2,666 at 0-80+y;<br>2,394 at 20-80+y | Not reported                                                                                                                                                                                                                                                                                                                                                                                                                                                                                                                                               |

## Rates, causes, place, and predictors of mortality in adults with intellectual disabilities with and without Down syndrome: cohort study with record linkage

|                                        |         |                                                                                                                                                                                                                                                                                                                                                                                                                                                                                                                                                                                                                                                                                                   |                                                      |                                                                                                                                                                                                                                                                                                                                                                                                                                                                                                                                                                                                                                                                                                                                                                                                      |
|----------------------------------------|---------|---------------------------------------------------------------------------------------------------------------------------------------------------------------------------------------------------------------------------------------------------------------------------------------------------------------------------------------------------------------------------------------------------------------------------------------------------------------------------------------------------------------------------------------------------------------------------------------------------------------------------------------------------------------------------------------------------|------------------------------------------------------|------------------------------------------------------------------------------------------------------------------------------------------------------------------------------------------------------------------------------------------------------------------------------------------------------------------------------------------------------------------------------------------------------------------------------------------------------------------------------------------------------------------------------------------------------------------------------------------------------------------------------------------------------------------------------------------------------------------------------------------------------------------------------------------------------|
| Heslop & Glover (2015) <sup>15</sup>   | England | Median 2.13 (interquartile range 1.09, 2.83) across geographic areas at 18-65+y                                                                                                                                                                                                                                                                                                                                                                                                                                                                                                                                                                                                                   | 18-65+y                                              | Not reported                                                                                                                                                                                                                                                                                                                                                                                                                                                                                                                                                                                                                                                                                                                                                                                         |
| Lauer & McCallion (2015) <sup>16</sup> | USA     | <i>Intellectual and developmental disabilities*</i> :<br>1.19 at all ages, 2011<br>1.49 at 18+y, 2009                                                                                                                                                                                                                                                                                                                                                                                                                                                                                                                                                                                             | 120,913 in 2009 at 18+y, 140,104 in 2011 at all ages | Not reported                                                                                                                                                                                                                                                                                                                                                                                                                                                                                                                                                                                                                                                                                                                                                                                         |
| Arvio et al (2016) <sup>17</sup>       | Finland | <i>Mild ID</i> :<br>2.28 (2.18, 2.39) at 0-60+y<br>1.99 (1.85, 2.13) to 2.77 (2.36, 3.23) at 15-60+y<br><i>M</i> : 2.01 (1.88, 2.14) at 0-60+y<br><i>F</i> : 2.80 (2.60, 3.01) at 0-60+y<br><i>Severe ID</i> :<br>3.41 (3.30, 3.52) at 0-60+y<br>2.07 (1.96, 2.19) to 8.77 (7.77, 9.87) at 15-60+y<br><i>M</i> : 2.59 (2.48, 2.72) at 0-60+y<br><i>F</i> : 5.24 (4.99, 5.50) at 0-60+y                                                                                                                                                                                                                                                                                                            | 5,171 at 0-60+y; 5,053 at 15-60y                     | Not reported                                                                                                                                                                                                                                                                                                                                                                                                                                                                                                                                                                                                                                                                                                                                                                                         |
| Hosking et al (2016) <sup>5</sup>      | England | HR=3.62 (3.33, 3.93) at 18-84y<br><i>M</i> : HR=3.30 (2.96, 3.68) at 18-84y<br><i>F</i> : HR=4.10 (3.61, 4.66) at 18-84y<br><i>With Down syndrome</i> : HR=9.21 (7.22, 11.76)<br><i>Without Down syndrome</i> : HR=3.19 (2.92, 3.49)<br><i>With epilepsy</i> : HR=6.04 (5.04, 7.24)<br><i>Without epilepsy</i> : HR=3.18 (2.90, 3.50)<br><i>With high level of support needs</i> : HR=4.77 (4.08, 5.59)<br><i>Without high level of support needs</i> : HR=3.28 (2.98, 3.62)<br><i>With autism</i> : HR=2.39 (1.45, 3.96)<br><i>Without autism</i> : HR=3.66 (3.37, 3.98)<br><i>In communal/shared homes</i> : HR=4.99 (4.36, 5.73)<br><i>Not in communal/shared homes</i> : HR=3.05 (2.74, 3.30) | 656 at 18-84y                                        | <i>Underlying cause at 18-84y</i> :<br>Circulatory: 21.6%, HR=3.05 (2.56, 3.64)<br>Respiratory: 18.8% (pneumonia and aspiration pneumonia), HR=6.68 (5.38, 8.29)<br>Neoplasm: 14.9%, HR=1.44 (1.18, 1.76)<br>Nervous system: 11.6%, HR=13.79 (9.70, 19.62)<br>Digestive: 7.0%, HR=4.02 (2.92, 5.54)<br>Congenital anomalies: 6.9%, HR could not be estimated<br>Mental disorders: 5.3%, HR=7.99 (5.19, 12.31)<br>External causes: 4.1%, HR=1.85 (1.26, 2.71)<br>Genitourinary: 3.5%, HR=10.89 (6.09, 19.47)<br>Endocrine, nutritional, and metabolic: 2.0%, HR=5.38 (2.79, 10.07)<br><i>Down syndrome</i> : Respiratory: 20.3% (or 42.4% if "Down syndrome" is excluded as an underlying cause of death)<br><i>Avoidable deaths</i> :<br>37% amenable (23% controls), 19% preventable (40% controls) |

## Rates, causes, place, and predictors of mortality in adults with intellectual disabilities with and without Down syndrome: cohort study with record linkage

|                                    |           |                                                                                                                                                                                                                                                                             |                                   |                                                                                                                                                                                                                                                                                                                                                                                                                                                                                                                                                                                                                                                                                                                                                                                                                                                                            |
|------------------------------------|-----------|-----------------------------------------------------------------------------------------------------------------------------------------------------------------------------------------------------------------------------------------------------------------------------|-----------------------------------|----------------------------------------------------------------------------------------------------------------------------------------------------------------------------------------------------------------------------------------------------------------------------------------------------------------------------------------------------------------------------------------------------------------------------------------------------------------------------------------------------------------------------------------------------------------------------------------------------------------------------------------------------------------------------------------------------------------------------------------------------------------------------------------------------------------------------------------------------------------------------|
| Lauer (2016) <sup>18</sup>         | USA       | Not reported                                                                                                                                                                                                                                                                | 438 in 2012, 409 in 2013, at 18+y | <p><i>Major cause of death, 2012, 2013</i></p> <p>Heart disease: 16.0%, 13.7%</p> <p>Neoplasm: 13.7%, 13.4%</p> <p>Alzheimer disease: 13.0%-12.2% (48% in Down syndrome)</p> <p>Aspiration pneumonia: 9.4%, 8.6%</p> <p>Septicaemia: 10.0%, 8.6%</p> <p>Chronic lower respiratory diseases: 4.6%, 6.6%</p> <p>Unintentional injury: 4.8%, 3.2%</p>                                                                                                                                                                                                                                                                                                                                                                                                                                                                                                                         |
| Troller et al (2017) <sup>19</sup> | Australia | <p>1.3 (1.2, 1.5) at 20+y</p> <p>4.0 (3.1, 5.2) at 20-44y</p> <p>2.3 (2.0, 2.7) at 45-64y</p> <p>1.0 (0.8, 1.2) at 65+y</p> <p>M: 1.4 (1.1, 1.6) at 20+y</p> <p>F: 1.3 (1.1, 1.6) at 20+y</p>                                                                               | 732 at 20-65+y                    | <p><i>Underlying cause at 20-65+y:</i></p> <p>Circulatory: 18%</p> <p>Neoplasm: 18%</p> <p>Nervous: 16%</p> <p>Respiratory: 12%</p> <p>Congenital anomaly: 11%</p> <p>Injury and poisoning: 6%</p> <p>Digestive: 5%</p> <p><i>Avoidable deaths: 31%</i></p>                                                                                                                                                                                                                                                                                                                                                                                                                                                                                                                                                                                                                |
| Glover et al (2017) <sup>6</sup>   | England   | <p>3.18 (2.94, 3.43) at 0-99y</p> <p>M: 3.03 (2.73, 3.35) at 0-99y</p> <p>F: 3.40 (3.02, 3.81) at 0-99y</p> <p>1.6 (1.2, 2.1) to 7.8 (5.4, 11.1) at 18-99y</p> <p>M: 1.5 (0.9, 2.2) to 6.6 (4.0, 10.1) at 18-99y</p> <p>F: 1.7 (1.1, 2.4) to 11.6 (6.0, 20.2) at 18-99y</p> | 664 at 0-99y                      | <p><i>Underlying cause at 0-99y:</i></p> <p>Circulatory: 22.9% (ischaemic heart disease 37.5%, cerebrovascular 25.7%, thrombophlebitis 6.6%, cardiomyopathy 5.9%, PE 3.9%), SMR=2.8 (2.4, 3.3)</p> <p>Respiratory: 17.2% (pneumonia 50.0%, pneumonitis 21.0%), SMR=4.9 (4.0, 5.9)</p> <p>Neoplasm: 3.1% (digestive 36.8%, respiratory 13.8%, female genital tract 10.3%, lymphoid and haematopoietic 10.3%), SMR=1.1 (0.9, 1.4)</p> <p>Nervous: 12.8%, SMR=9.8 (7.8, 12.1)</p> <p>Congenital anomalies: 8.4%, SMR=72.9 (55.1, 94.7)</p> <p>Digestive: 7.8%, SMR=4.0 (3.0, 5.2)</p> <p>No ICD10 chapters had fewer than expected deaths</p> <p>Other common single causes: dementia 33/664, epilepsy 26/664, cerebral palsy 23/664</p> <p><i>Avoidable deaths:</i></p> <p>44.7% (41.0%, 48.5%), mostly amenable</p> <p>M: 50.9% (45.9%, 56.0%); F: 36.9% (31.5%, 42.5%)</p> |

COPD=chronic obstructive pulmonary disease; HR=hazard ratio; ID=intellectual disabilities; OR=odds ratio; PE=pulmonary embolism; SMR=standardised mortality ratio; y=years

\*Includes some individuals with IQ>70

*Rates, causes, place, and predictors of mortality in adults with intellectual disabilities with and without Down syndrome: cohort study with record linkage*

*Rates, causes, place, and predictors of mortality in adults with intellectual disabilities with and without Down syndrome: cohort study with record linkage*

## Supplementary table 2. Groupings of related causes of deaths

| <b>Infectious diseases</b>                                                | <b>ICD10</b> |
|---------------------------------------------------------------------------|--------------|
| <b>Infection</b>                                                          |              |
| ENTEROCOLITIS DUE TO CLOSTRIDIUM DIFFICILE                                | A047         |
| SEPSIS DUE TO STAPHYLOCOCCUS AUREUS                                       | A410         |
| SEPSIS, UNSPECIFIED                                                       | A419         |
| BACTERIAL INFECTION, UNSPECIFIED                                          | A499         |
| SUBACUTE SCLEROSING PANENCEPHALITIS                                       | A811         |
| CHRONIC VIRAL HEPATITIS B WITHOUT DELTA-AGENT                             | B181         |
| PULMONARY CANDIDIASIS                                                     | B371         |
| NECROTISING FASCIITIS                                                     | M726         |
| URINARY TRACT INFECTION, SITE NOT SPECIFIED                               | N390         |
| <b>Neoplasms</b>                                                          |              |
| <b>Gastrointestinal malignant neoplasms</b>                               |              |
| MALIGNANT NEOPLASM OF PAROTID GLAND                                       | C07          |
| MALIGNANT NEOPLASM, OESOPHAGUS, UNSPECIFIED                               | C159         |
| MALIGNANT NEOPLASM, STOMACH, UNSPECIFIED                                  | C169         |
| MALIGNANT NEOPLASM, CAECUM                                                | C180         |
| MALIGNANT NEOPLASM, SIGMOID COLON                                         | C187         |
| MALIGNANT NEOPLASM, COLON, UNSPECIFIED                                    | C189         |
| INTRAHEPATIC BILE DUCT CARCINOMA                                          | C221         |
| NEOPLASM OF UNCERTAIN OR UNKNOWN BEHAVIOUR, OTHER DIGESTIVE ORGANS        | D377         |
| <b>Other neoplasms</b>                                                    |              |
| MALIGNANT NEOPLASM, LOWER LOBE, BRONCHUS OR LUNG                          | C343         |
| MALIGNANT NEOPLASM, BRONCHUS OR LUNG, UNSPECIFIED                         | C349         |
| MALIGNANT NEOPLASM, BREAST, UNSPECIFIED                                   | C509         |
| MALIGNANT NEOPLASM, ENDOMETRIUM                                           | C541         |
| MALIGNANT NEOPLASM OF OVARY                                               | C56          |
| MALIGNANT NEOPLASM, TESTIS, UNSPECIFIED                                   | C629         |
| MALIGNANT NEOPLASM, BLADDER, UNSPECIFIED                                  | C679         |
| MALIGNANT NEOPLASMS OF THYROID GLAND                                      | C73          |
| WALDENSTROM MACROGLOBULINAEMIA                                            | C880         |
| NON-HODGKIN'S LYMPHOMA, UNSPECIFIED                                       | C859         |
| MALIGNANT NEOPLASM OF UNSPECIFIED SITE                                    | C80          |
| NEOPLASM OF UNCERTAIN OR UNKNOWN BEHAVIOUR, TRACHEA, BRONCHUS AND LUNG    | D381         |
| SECONDARY MALIGNANT NEOPLASM OF LUNG                                      | C780         |
| SECONDARY MALIGNANT NEOPLASM OF LIVER AND INTRAHEPATIC BILE DUCT          | C787         |
| SECONDARY MALIGNANT NEOPLASM OF BRAIN AND CEREBRAL MENINGES               | C793         |
| SECONDARY MALIGNANT NEOPLASM OF OTHER SPECIFIED SITES                     | C798         |
| <b>Endocrine and metabolic diseases</b>                                   |              |
| <b>Diabetes</b>                                                           |              |
| INSULIN-DEPENDENT DIABETES MELLITUS WITHOUT COMPLICATIONS                 | E109         |
| NON-INSULIN-DEPENDENT DIABETES MELLITUS WITH RENAL COMPLICATIONS          | E112         |
| NON-INSULIN-DEPENDENT DIABETES MELLITUS W. PERIPHERAL CIRC. COMPLICATIONS | E115         |
| NON-INSULIN-DEPENDENT DIABETES MELLITUS WITHOUT COMPLICATIONS             | E119         |
| UNSPECIFIED DIABETES MELLITUS WITH RENAL COMPLICATIONS                    | E142         |

*Rates, causes, place, and predictors of mortality in adults with intellectual disabilities with and without Down syndrome: cohort study with record linkage*

|                                                                           |      |
|---------------------------------------------------------------------------|------|
| UNSPECIFIED DIABETES MELLITUS WITHOUT COMPLICATIONS                       | E149 |
| ABNORMAL GLUCOSE TOLERANCE TEST                                           | R730 |
| HYPERGLYCAEMIA, UNSPECIFIED                                               | R739 |
| <b>Metabolic disorders</b>                                                |      |
| OTHER HYPERPHENYLALANINAEMIAS                                             | E701 |
| DISORDERS OF PHOSPHORUS METABOLISM & PHOSPHATASES                         | E833 |
| DISORDERS OF PLASMA-PROTEIN METABOLISM, NOT ELSEWHERE CLASSIFIED          | E880 |
| <b>Mental disorders</b>                                                   |      |
| <b>Dementias</b>                                                          |      |
| VASCULAR DEMENTIA, UNSPECIFIED                                            | F019 |
| UNSPECIFIED DEMENTIA                                                      | F03  |
| ALZHEIMER'S DISEASE WITH LATE ONSET                                       | G301 |
| ALZHEIMER'S DISEASE, UNSPECIFIED                                          | G309 |
| <b>Mental health</b>                                                      |      |
| MENTAL AND BEHAVIOURAL DISORDERS DUE TO ACUTE INTOXICATION WITH ALCOHOL   | F100 |
| MENTAL AND BEHAVIOURAL DISORDERS DUE TO ALCOHOL DEPENDENCE SYNDROME       | F102 |
| MENTAL AND BEHAVIOURAL DISORDERS DUE TO USE OF TOBACCO, UNSPECIFIED       | F179 |
| SCHIZOPHRENIA, UNSPECIFIED                                                | F209 |
| BIPOLAR AFFECTIVE DISORDER, UNSPECIFIED                                   | F319 |
| OTHER & UNSPEC SYMPTOMS & SIGNS INVOLVING COGNITIVE FUNCTIONS & AWARENESS | R418 |
| INTENTIONAL SELF-HARM BY JUMPING FROM A HIGH PLACE                        | X80  |
| <b>Intellectual disabilities</b>                                          |      |
| UNSPECIFIED MENTAL RETARDATION                                            | F79  |
| DEVELOPMENTAL DISORDER OF SCHOLASTIC SKILLS, UNSPECIFIED                  | F819 |
| <b>Nervous system</b>                                                     |      |
| <b>Epilepsies</b>                                                         |      |
| GENERALIZED IDIOPATHIC EPILEPSY AND EPILEPTIC SYNDROMES                   | G403 |
| EPILEPSY, UNSPECIFIED                                                     | G409 |
| STATUS EPILEPTICUS, UNSPECIFIED                                           | G419 |
| MYOTONIC DISORDERS                                                        | G711 |
| OTHER AND UNSPECIFIED CONVULSIONS                                         | R568 |
| <b>Cerebral palsy</b>                                                     |      |
| SPASTIC QUADRAPLEGIC CEREBRAL PALSY                                       | G800 |
| SPASTIC HEMIPLEGIC CEREBRAL PALSY                                         | G802 |
| OTHER CEREBRAL PALSY                                                      | G808 |
| CEREBRAL PALSY, UNSPECIFIED                                               | G809 |
| TETRAPLEGIA, UNSPECIFIED                                                  | G825 |
| <b>Other neurological conditions</b>                                      |      |
| SEQUELAE OF INFLAMMATORY DISEASES OF CENTRAL NERVOUS SYSTEM               | G09  |
| PARKINSON'S DISEASE                                                       | G20  |
| MYONEURAL DISORDER, UNSPECIFIED                                           | G709 |
| ENCEPHALITIS, MYELITIS AND ENCEPHALOMYELITIS, UNSPECIFIED                 | G049 |
| ANOXIC BRAIN DAMAGE, NOT ELSEWHERE CLASSIFIED                             | G931 |
| BLINDNESS, BINOCULAR                                                      | H540 |
| OTHER DISORDERS OF NERVOUS SYSTEM, NOT ELSEWHERE CLASSIFIED               | G98  |

*Rates, causes, place, and predictors of mortality in adults with intellectual disabilities with and without Down syndrome: cohort study with record linkage*

## **Circulatory system**

### **Acute myocardial infarction**

|                                          |      |
|------------------------------------------|------|
| ACUTE MYOCARDIAL INFARCTION, UNSPECIFIED | I219 |
| CARDIAC ARRECT, UNSPECIFIED              | I469 |

### **Other ischaemic heart disease**

|                                                               |      |
|---------------------------------------------------------------|------|
| HYPERTENSIVE HEART DISEASE WITHOUT (CONGESTIVE) HEART FAILURE | I119 |
| ACUTE ISCHAEMIC HEART DISEASE, UNSPECIFIED                    | I249 |
| ATHEROSCLEROTIC HEART DISEASE                                 | I251 |
| CHRONIC ISCHAEMIC HEART DISEASE, UNSPECIFIED                  | I259 |
| ATHEROSCLEROSIS OF AORTA                                      | I700 |
| GENERALIZED AND UNSPECIFIED ATHEROSCLEROSIS                   | I709 |

### **Heart failure**

|                            |      |
|----------------------------|------|
| HEART FAILURE, UNSPECIFIED | I509 |
| LEFT VENTRICULAR FAILURE   | I501 |
| CONGESTIVE HEART FAILURE   | I500 |

### **Other cardiovascular disease**

|                                                                           |      |
|---------------------------------------------------------------------------|------|
| PULMONARY EMBOLISM WITHOUT MENTION OF ACUTE COR PULMONALE                 | I269 |
| OTHER SPECIFIED PULMONARY HEART DISEASES                                  | I278 |
| PULMONARY HEART DISEASE, UNSPECIFIED                                      | I279 |
| AORTIC (VALVE) STENOSIS                                                   | I350 |
| ATRIAL FIBRILLATION AND FLUTTER                                           | I48  |
| VENTRICULAR FIBRILLATION AND FLUTTER                                      | I490 |
| OTHER ILL-DEFINED HEART DISEASES                                          | I518 |
| PULMONARY OEDEMA                                                          | J81  |
| CARDIOGENIC SHOCK                                                         | R570 |
| PERIPHERAL VASCULAR DISEASE, UNSPECIFIED                                  | I739 |
| PHLEBITIS AND THROMBOPHLEBITIS OF OTHER DEEP VESSELS OF LOWER EXTREMITIES | I802 |
| EMBOLISM AND THROMBOSIS OF OTHER SPECIFIED VEINS                          | I828 |
| ACUTE AND SUBACUTE INFECTIVE ENDOCARDITIS                                 | I330 |
| ACUTE ENDOCARDITIS, UNSPECIFIED                                           | I339 |
| ENDOCARDITIS, VALVE UNSPECIFIED                                           | I38  |
| DILATED CARDIOMYOPATHY                                                    | I420 |
| CARDIOMEGALY                                                              | I517 |
| ESSENTIAL (PRIMARY) HYPERTENSION                                          | I10  |

### **Stroke**

|                                                                |      |
|----------------------------------------------------------------|------|
| INTRACEREBRAL HAEMORRHAGE, UNSPECIFIED                         | I619 |
| CEREBRAL INFARCTION DUE TO THROMBOSIS OF PRECEREBRAL ARTERIES  | I630 |
| CEREB INFARCT DUE TO UNSPEC OCCL/STENOSIS OF PRECEREB ARTERIES | I632 |
| CEREBRAL INFARCTION, UNSPECIFIED                               | I639 |
| STROKE, NOT SPECIFIED AS HAEMORRHAGE OR INFARCTION             | I64  |
| CEREBROVASCULAR DISEASE, UNSPECIFIED                           | I679 |
| SEQUELAE OF STROKE, NOT SPECIFIED AS HAEMORRHAGE OR INFARCTION | I694 |
| SEQUELAE OF OTHER AND UNSPECIFIED CEREBROVASCULAR DISEASES     | I698 |

## **Respiratory system**

### **Respiratory infection**

|                                                                            |      |
|----------------------------------------------------------------------------|------|
| ACUTE UPPER RESPIRATORY INFECTION, UNSPECIFIED                             | J069 |
| INFLUENZA WITH PNEUMONIA, OTHER INFLUENZA VIRUS IDENTIFIED                 | J100 |
| INFLUENZA WITH OTHER RESP MANIFESTATIONS, OTHER INFLUENZA VIRUS IDENTIFIED | J101 |



*Rates, causes, place, and predictors of mortality in adults with intellectual disabilities with and without Down syndrome: cohort study with record linkage*

|                                                                           |      |
|---------------------------------------------------------------------------|------|
| PNEUMONIA DUE TO STREPTOCOCCUS PNEUMONIAE                                 | J13  |
| BRONCHOPNEUMONIA, UNSPECIFIED                                             | J180 |
| LOBAR PNEUMONIA, UNSPECIFIED                                              | J181 |
| HYPOSTATIC PNEUMONIA, UNSPECIFIED                                         | J182 |
| PNEUMONIA, UNSPECIFIED                                                    | J189 |
| UNSPECIFIED ACUTE LOWER RESPIRATORY INFECTION                             | J22  |
| CHRONIC OBSTRUCTIVE PULMONARY DISEASE WITH ACUTE LOWER RESP INFECTION     | J440 |
| <b>Aspiration/reflux/choking</b>                                          |      |
| PNEUMONITIS DUE TO FOOD AND VOMIT                                         | J690 |
| GASTRO-OESOPHAGEAL REFLUX DISEASE WITHOUT OESOPHAGITIS                    | K219 |
| INHALATION AND INGESTION OF FOOD CAUSING OBSTRUCTION OF RESPIRATORY TRACT | W79  |
| FOREIGN BODY IN RESPIRATORY TRACT, PART UNSPECIFIED                       | T179 |
| INHALATION/INGESTION OF OTHER OBJECTS CAUSING OBSTRUCT OF RESP TRACT      | W80  |
| <b>Other respiratory disorders</b>                                        |      |
| UNSPECIFIED CHRONIC BRONCHITIS                                            | J42  |
| EMPHYSEMA, UNSPECIFIED                                                    | J439 |
| CHRONIC OBSTRUCTIVE PULMONARY DISEASE, UNSPECIFIED                        | J440 |
| ASTHMA, UNSPECIFIED                                                       | J459 |
| BRONCHIECTASIS                                                            | J47  |
| OTHER INTERSTITIAL PULMONARY DISEASES WITH FIBROSIS                       | J841 |
| PLEURAL EFFUSION, NOT ELSEWHERE CLASSIFIED                                | J90  |
| CHRONIC RESPIRATORY FAILURE                                               | J961 |
| RESPIRATORY FAILURE, UNSPECIFIED                                          | J969 |
| OTHER SPECIFIED RESPIRATORY DISORDERS                                     | J988 |
| DYSPNOEA                                                                  | R060 |
| RESPIRATORY ARREST                                                        | R092 |
| ASPHYXIATION                                                              | T71  |
| UNSPECIFIED THREAT TO BREATHING                                           | W84  |
| <b>Digestive system</b>                                                   |      |
| <b>Ulcer/gastrointestinal perforation</b>                                 |      |
| OESOPHAGITIS                                                              | K20  |
| PERFORATION OF INTESTINE (NONTRAUMATIC)                                   | K631 |
| PERITONITIS, UNSPECIFIED                                                  | K659 |
| GASTRIC ULCER, CHRONIC OR UNSPECIFIED WITH PERFORATION                    | K255 |
| OTHER PERITONITIS                                                         | K658 |
| ACUTE PERITONITIS                                                         | K650 |
| GASTROINTESTINAL HAEMORRHAGE, UNSPECIFIED                                 | K922 |
| ULCER OF INTESTINE                                                        | K633 |
| <b>Other gastrointestinal disorders</b>                                   |      |
| BARRETT'S OESOPHAGUS                                                      | K227 |
| DIAPHRAGMATIC HERNIA WITHOUT OBSTRUCTION OR GANGRENE                      | K449 |
| OTHER SPECIFIED NONINFECTIVE GASTROENTERITIS AND COLITIS                  | K528 |
| ACUTE VASCULAR DISORDERS OF INTESTINE                                     | K550 |
| VASCULAR DISORDER OF INTESTINE, UNSPECIFIED                               | K559 |
| VOLVULUS                                                                  | K562 |
| OTHER AND UNSPECIFIED INTESTINAL OBSTRUCTION                              | K566 |
| CONSTIPATION                                                              | K590 |

*Rates, causes, place, and predictors of mortality in adults with intellectual disabilities with and without Down syndrome: cohort study with record linkage*

|                                                  |      |
|--------------------------------------------------|------|
| MEGACOLON, NOT ELSEWHERE CLASSIFIED              | K593 |
| ACUTE AND SUBACUTE HEPATIC FAILURE               | K720 |
| OTHER AND UNSPECIFIED CIRRHOSIS OF LIVER         | K746 |
| AUTOIMMUNE HEPATITIS                             | K754 |
| INFLAMMATORY LIVER DISEASE, UNSPECIFIED          | K759 |
| OTHER SPECIFIED DISEASES OF LIVER                | K768 |
| CALCULUS OF GALLBLADDER WITH OTHER CHOLECYSTITIS | K801 |
| CHOLANGITIS                                      | K830 |
| ACUTE PANCREATITIS, UNSPECIFIED                  | K859 |
| PSEUDOCYST OF PANCREAS                           | K863 |
| INTESTINAL MALABSORPTION, UNSPECIFIED            | K909 |
| DYSPHAGIA                                        | R13  |

## **Genitourinary system**

### **Renal failure**

|                                         |      |
|-----------------------------------------|------|
| CHRONIC NEPHRITIC SYNDROME, UNSPECIFIED | N039 |
| OTHER ACUTE RENAL FAILURE               | N178 |
| ACUTE RENAL FAILURE, UNSPECIFIED        | N179 |
| END-STAGE RENAL DISEASE                 | N180 |
| CHRONIC KIDNEY DISEASE, STAGE 5         | N185 |
| CHRONIC KIDNEY DISEASE, UNSPECIFIED     | N189 |
| UNSPECIFIED KIDNEY FAILURE              | N19  |

## **Chromosomal abnormalities**

### **Down syndrome**

|                              |      |
|------------------------------|------|
| DOWN'S SYNDROME, UNSPECIFIED | Q909 |
|------------------------------|------|

### **Other congenital condition**

|                                                                           |      |
|---------------------------------------------------------------------------|------|
| CONGENITAL HYDROCEPHALUS, UNSPECIFIED                                     | Q039 |
| SPINA BIFIDA, UNSPECIFIED                                                 | Q059 |
| CONGENITAL MALFORMATION OF HEART, UNSPECIFIED                             | Q249 |
| CONGENITAL DEFORMITY OF SPINE                                             | Q675 |
| CONGEN MALFORMATION SYNDROMES PREDOMINANTLY ASSOCIATED WITH SHORT STATURE | Q871 |
| MARFAN'S SYNDROME                                                         | Q874 |
| OTHER SPECIFIED CONGEN MALFORMATION SYNDROMES, NOT ELSEWHERE CLASSIFIED   | Q878 |
| CONGENITAL MALFORMATION, UNSPECIFIED                                      | Q899 |
| KLINEFELTER'S SYNDROME, UNSPECIFIED                                       | Q984 |
| FRAGILE X CHROMOSOME                                                      | Q992 |
| OTHER LACK OF EXPECTED NORMAL PHYSIOLOGICAL DEVELOPMENT                   | R628 |

## **Other conditions occurring with small frequency**

### **Other condition**

|                                   |      |
|-----------------------------------|------|
| DECUBITUS ULCER AND PRESSURE AREA | L89  |
| SCOLIOSIS, UNSPECIFIED            | M419 |
| URETHRAL STRICTURE, UNSPECIFIED   | N359 |
| EPISTAXIS                         | R040 |
| IMMOBILITY                        | R263 |
| MALaise AND FATIGUE               | R53  |
| GENERALIZED ENLARGED LYMPH NODES  | R591 |

*Rates, causes, place, and predictors of mortality in adults with intellectual disabilities with and without Down syndrome: cohort study with record linkage*

|                                                           |      |
|-----------------------------------------------------------|------|
| INSUFFICIENT INTAKE OF FOOD AND WATER DUE TO SELF NEGLECT | R636 |
| OTHER SPECIFIED GENERAL SYMPTOMS AND SIGNS                | R688 |
| OTHER ILL-DEFINED AND UNSPECIFIED CAUSES OF MORTALITY     | R99  |
| EXPOSURE TO UNSPECIFIED FACTOR                            | X59  |
| MULTI-SYSTEM DEGENERATION                                 | G903 |
| BENIGN NEOPLASM, MENINGES, UNSPECIFIED                    | D329 |
| AGRANULOCYTOSIS                                           | D70  |
| SARCOIDOSIS OF OTHER AND COMBINED SITES                   | D868 |
| SARCOIDOSIS, UNSPECIFIED                                  | D869 |
| HYPOPITUITARISM                                           | E230 |
| HYPOTHYROIDISM, UNSPECIFIED                               | E039 |
| OTHER THYROTOXICOSIS                                      | E058 |
| VOLUME DEPLETION                                          | E86  |

## **Injuries and external causes**

### **Injuries and accidents**

|                                        |      |
|----------------------------------------|------|
| INTRACRANIAL INJURY, UNSPECIFIED       | S069 |
| UNSPECIFIED INJURY OF HEAD             | S099 |
| INJURY OF COLON                        | S365 |
| FRACTURE OF NECK OF FEMUR              | S720 |
| FRACTURE OF SHAFT OF TIBIA             | S822 |
| UNSPECIFIED MULTIPLE INJURIES          | T07  |
| FAT EMBOLISM (TRAUMATIC)               | T791 |
| SEQUELAE OF UNSPECIFIED INJURY OF HEAD | T909 |
| UNSPECIFIED FALL                       | W19  |
| SEQUELAE OF OTHER ACCIDENTS            | Y86  |

### **Medical/surgical complication**

|                                                                           |      |
|---------------------------------------------------------------------------|------|
| POISONING BY OTHER ANTIDYSRHYTHMIC DRUGS, NOT ELSEWHERE CLASSIFIED        | T462 |
| ADVERSE EFFECTS OF OTHER ANTIDYSRHYTHMIC DRUGS, NOT ELSEWHERE CLASSIFIED  | Y522 |
| ABN REACT TO/LATER COMPLIC OF OP WITH IMPLANT OF ARTIFICIAL INTERN DEVICE | Y831 |
| ABN REACT TO/LATER COMPLIC OF OP WITH ANASTOMOSIS, BYPASS OR GRAFT        | Y832 |
| ABN REACT TO/LATER COMPLIC OF OP WITH FORMATION OF EXTERNAL STOMA         | Y833 |
| ABNORMAL REACTION TO OR LATER COMPLICATION OF OTHER MEDICAL PROCEDURES    | Y848 |
| SEQ OF PROCED CAUSING ABN REACT/COMPLIC,W/O MENTION OF MISADV AT THE TIME | Y883 |
| OTHER POSTPROCEDURAL RESPIRATORY DISORDERS                                | J958 |

Rates, causes, place, and predictors of mortality in adults with intellectual disabilities with and without Down syndrome: cohort study with record linkage

### Supplementary table 3. Predictors of the outcome time to death from univariate analyses

| Variable                         |                     | N with event/<br>N in group | Hazard ratio<br>(95% CI) | Individual p-value | Overall p-value |
|----------------------------------|---------------------|-----------------------------|--------------------------|--------------------|-----------------|
| <b>Demographics</b>              |                     |                             |                          |                    |                 |
| Age at time of health assessment |                     | 294/961                     | 1.05 (1.04, 1.06)        | <0.0001            |                 |
| Sex                              | Male                | 154/525                     | 0.88 (0.70, 1.11)        | 0.2730             |                 |
|                                  | Female              | 140/436                     | 1.00 (-)                 |                    |                 |
| Ability level                    | Mild ID             | 92/382                      | 1.00 (-)                 |                    | 0.0007          |
|                                  | Moderate ID         | 73/236                      | 1.38 (1.01, 1.87)        | 0.0411             |                 |
|                                  | Severe ID           | 67/180                      | 1.75 (1.28, 2.40)        | 0.0005             |                 |
|                                  | Profound ID         | 62/163                      | 1.77 (1.28, 2.45)        | 0.0005             |                 |
| Type of accommodation            | Family carer        | 70/374                      | 1.00 (-)                 |                    | <0.0001         |
|                                  | Independent of care | 36/93                       | 2.35 (1.57, 3.52)        | <0.0001            |                 |
|                                  | Paid support        | 161/435                     | 2.18 (1.65, 2.88)        | <0.0001            |                 |
|                                  | Congregate          | 27/59                       | 2.87 (1.84, 4.48)        | <0.0001            |                 |
| Neighbourhood deprivation        | 1 – most affluent   | 18/73                       | 1.00 (-)                 |                    | 0.1890          |
|                                  | 2                   | 56/137                      | 1.92 (1.13, 3.27)        | 0.0158             |                 |
|                                  | 3                   | 10/45                       | 0.90 (0.42, 1.95)        | 0.7896             |                 |
|                                  | 4                   | 10/40                       | 1.06 (0.49, 2.30)        | 0.8808             |                 |
|                                  | 5                   | 12/32                       | 1.71 (0.82, 3.55)        | 0.1527             |                 |
|                                  | 6                   | 9/32                        | 1.27 (0.57, 2.82)        | 0.5640             |                 |
|                                  | 7                   | 9/34                        | 1.09 (0.49, 2.43)        | 0.8302             |                 |
|                                  | 8                   | 15/58                       | 1.21 (0.61, 2.41)        | 0.5818             |                 |
|                                  | 9                   | 35/124                      | 1.22 (0.69, 2.16)        | 0.4882             |                 |
|                                  | 10 - most deprived  | 120/386                     | 1.41 (0.86, 2.31)        | 0.1782             |                 |
| Civil status                     | Single              | 288/938                     | 1.28 (0.57, 2.87)        | 0.5485             |                 |
|                                  | Not single          | 6/23                        | 1.00 (-)                 |                    |                 |
| Employment/day activities        | Yes                 | 83/231                      | 1.33 (1.03, 1.71)        | 0.0284             |                 |
|                                  | No                  | 211/730                     | 1.00 (-)                 |                    |                 |
| Smoker                           | Yes                 | 46/101                      | 1.70 (1.24, 2.33)        | 0.0009             |                 |
|                                  | No                  | 248/860                     | 1.00 (-)                 |                    |                 |
| <b>Health</b>                    |                     |                             |                          |                    |                 |
| Down syndrome                    | Yes                 | 64/179                      | 1.30 (0.98, 1.71)        | 0.0673             |                 |
|                                  | No                  | 230/782                     | 1.00 (-)                 |                    |                 |
| Epilepsy                         | Yes                 | 111/325                     | 1.25 (0.99, 1.58)        | 0.0636             |                 |
|                                  | No                  | 183/636                     | 1.00 (-)                 |                    |                 |
| Spastic quadriplegia             | Yes                 | 24/325                      | 1.67 (1.10, 2.54)        | 0.0158             |                 |
|                                  | No                  | 183/636                     | 1.00 (-)                 |                    |                 |
| Impaired mobility                | Yes                 | 195/735                     | 0.51 (0.40, 0.65)        | <0.0001            |                 |
|                                  | No                  | 99/226                      | 1.00 (-)                 |                    |                 |
| Body mass index                  | Underweight         | 9/43                        | 0.63 (0.32, 1.25)        | 0.1847             | 0.1865          |
|                                  | Acceptable          | 83/265                      | 1.00 (-)                 |                    |                 |
|                                  | Overweight          | 75/289                      | 0.78 (0.57, 1.06)        | 0.1132             |                 |
|                                  | Obese               | 81/237                      | 1.08 (0.80, 1.47)        | 0.6152             |                 |
|                                  | Morbidly obese      | 16/58                       | 0.87 (0.51, 1.48)        | 0.6058             |                 |
| Hearing impairment               | Yes                 | 112/267                     | 1.79 (1.41, 2.26)        | <0.0001            |                 |
|                                  | No                  | 182/694                     | 1.00 (-)                 |                    |                 |
| Visual impairment                | Yes                 | 154/449                     | 1.29 (1.02, 1.62)        | 0.0317             |                 |
|                                  | No                  | 140/512                     | 1.00 (-)                 |                    |                 |

*Rates, causes, place, and predictors of mortality in adults with intellectual disabilities with and without Down syndrome: cohort study with record linkage*

|                                                  |     |          |                    |         |  |
|--------------------------------------------------|-----|----------|--------------------|---------|--|
| Urinary incontinence                             | Yes | 158/632  | 0.52 (0.41, 0.65)  | <0.0001 |  |
|                                                  | No  | 136/329  | 1.00 (-)           |         |  |
| Bowel incontinence                               | Yes | 197/733  | 0.55 (0.43, 0.70)  | <0.0001 |  |
|                                                  | No  | 97/228   | 1.00 (-)           |         |  |
| Diabetes                                         | Yes | 29/47    | 2.72 (1.86, 4.00)  | <0.0001 |  |
|                                                  | No  | 265/914  | 1.00 (-)           |         |  |
| PEG/tube fed                                     | Yes | N/7      | 4.99 (2.22, 11.20) | 0.0001  |  |
|                                                  | No  | 288/954  |                    |         |  |
| Constipation                                     | Yes | 112/316  | 1.34 (1.06, 1.70)  | 0.0145  |  |
|                                                  | No  | 182/645  | 1.00 (-)           |         |  |
| Ataxia/gait disorder                             | Yes | 104/276  | 1.50 (1.18, 1.90)  | 0.0009  |  |
|                                                  | No  | 190/685  | 1.00 (-)           |         |  |
| Nail disorder                                    | Yes | 74/223   | 1.18 (0.91, 1.54)  | 0.2120  |  |
|                                                  | No  | 220/738  | 1.00 (-)           |         |  |
| Epidermal thickening                             | Yes | 66/207   | 1.10 (0.84, 1.45)  | 0.4947  |  |
|                                                  | No  | 228/754  | 1.00 (-)           |         |  |
| Cerebral palsy                                   | Yes | 54/175   | 1.02 (0.76, 1.37)  | 0.8792  |  |
|                                                  | No  | 240/786  | 1.00 (-)           |         |  |
| Osteoporosis                                     | Yes | 76/174   | 1.71 (1.32, 2.22)  | <0.0001 |  |
|                                                  | No  | 218/786  | 1.00 (-)           |         |  |
| Fungal infection                                 | Yes | 42/158   | 0.83 (0.61, 1.18)  | 0.3366  |  |
|                                                  | No  | 252/803  | 1.00 (-)           |         |  |
| Hypertension                                     | Yes | 56/146   | 1.36 (1.01, 1.82)  | 0.0399  |  |
|                                                  | No  | 238/815  | 1.00 (-)           |         |  |
| Dysphagia                                        | Yes | 51/132   | 1.51 (1.11, 2.04)  | 0.0080  |  |
|                                                  | No  | 243/829  | 1.00 (-)           |         |  |
| Dyspnoea                                         | Yes | 49/130   | 1.41 (1.04, 1.92)  | 0.0285  |  |
|                                                  | No  | 245/831  | 1.00 (-)           |         |  |
| Musculoskeletal pain                             | Yes | 48/148   | 1.14 (0.83, 1.55)  | 0.4153  |  |
|                                                  | No  | 246/813  | 1.00 (-)           |         |  |
| Bone deformity                                   | Yes | 50/139   | 1.32 (0.97, 1.79)  | 0.0769  |  |
|                                                  | No  | 244/822  | 1.00 (-)           |         |  |
| Dental/oral problem                              | Yes | 38/120   | 1.07 (0.76, 1.50)  | 0.7128  |  |
|                                                  | No  | 256/841  | 1.00 (-)           |         |  |
| Eczema/dermatitis                                | Yes | 38/138   | 0.86 (0.61, 1.21)  | 0.3790  |  |
|                                                  | No  | 256/823  | 1.00 (-)           |         |  |
| GORD                                             | Yes | 51/133   | 1.43 (1.06, 1.94)  | 0.0198  |  |
|                                                  | No  | 243/828  | 1.00 (-)           |         |  |
| Lower respiratory tract infection                | Yes | 55/126   | 1.75 (1.30, 2.34)  | 0.0002  |  |
|                                                  | No  | 239/835  | 1.00 (-)           |         |  |
| Total number of physical conditions              |     | 294/961  | 1.06 (1.04, 1.08)  | <0.0001 |  |
| Psychosis                                        | Yes | 11 /42   | 0.81 (0.44, 1.48)  | 0.4990  |  |
|                                                  | No  | 283 /919 | 1.00 (-)           |         |  |
| Affective disorder including bipolar             | Yes | 24/68    | 1.19 (0.78, 1.80)  | 0.4216  |  |
|                                                  | No  | 270/893  | 1.00 (-)           |         |  |
| Autism                                           | Yes | 13/69    | 0.54 (0.31, 0.94)  | 0.0306  |  |
|                                                  | No  | 281/892  | 1.00 (-)           |         |  |
| Problem behaviour                                | Yes | 71/218   | 1.09 (0.83, 1.42)  | 0.5251  |  |
|                                                  | No  | 223/743  | 1.00 (-)           |         |  |
| Eating disorder, including pica                  | Yes | 5/17     | 0.99 (0.41, 2.40)  | 0.9857  |  |
|                                                  | No  | 289/944  | 1.00 (-)           |         |  |
| Any mental illness, excluding problem behaviours | Yes | 73/217   | 1.16 (0.89, 1.51)  | 0.2849  |  |
|                                                  | No  | 221/744  | 1.00 (-)           |         |  |
| <b>Service use</b>                               |     |          |                    |         |  |
| Number of GP consultations in last 12 months     |     | 287/951  | 1.05 (1.03, 1.06)  | <0.0001 |  |

*Rates, causes, place, and predictors of mortality in adults with intellectual disabilities with and without Down syndrome: cohort study with record linkage*

|                                             |     |         |                   |         |  |
|---------------------------------------------|-----|---------|-------------------|---------|--|
| Number of A&E attendances in last 12 months |     | 280/938 | 1.09 (0.99, 1.20) | 0.0847  |  |
| Number of health professions providing care |     | 294/961 | 1.10 (1.03, 1.16) | 0.0023  |  |
| <b>Prescriptions</b>                        |     |         |                   |         |  |
| Antipsychotics                              | Yes | 79/226  | 1.12 (0.94, 1.57) | 0.1421  |  |
|                                             | No  | 215/735 | 1.00 (-)          |         |  |
| Antidepressants                             | Yes | 39/118  | 1.16 (0.83, 1.63) | 0.3778  |  |
|                                             | No  | 255/843 | 1.00 (-)          |         |  |
| Anxiolytic/hypnotics                        | Yes | 20/68   | 0.95 (0.60, 1.49) | 0.8159  |  |
|                                             | No  | 274/893 | 1.00 (-)          |         |  |
| Antiepileptics                              | Yes | 90/253  | 1.31 (1.02, 1.68) | 0.0315  |  |
|                                             | No  | 204/708 | 1.00 (-)          |         |  |
| Number of drug classes taken                |     | 294/961 | 1.16 (1.12, 1.21) | <0.0001 |  |

A&E=accident and emergency; CI=confidence interval; GORD=gastro-oesophageal reflux disorder; PEG=percutaneous endoscopic gastrostomy
